# Supplementary material for: Interacting Symbionts and Immunity in the Amphibian Skin Mucosome Predict Disease Risk and Probiotic Effectiveness
Source: PLOS journal article supplement (doi:10.1371/journal.pone.0096375), 2014-04-30
Supplement: S1 (10.1371/journal.pone.0096375.s001) [file journal.pone.0096375.s001]

## Supporting Information

### Interacting symbionts and immunity in the amphibian skin mucosome predict disease risk and probiotic effectiveness

#### Contents:

- I. Protocol for determining *Bd* viability
- II. Supplementary Tables
  - Table S1. Bacterial isolates and accession numbers
  - Table S2. Data table for environmental context experiments
- III. Supplementary Figures
  - Figure S1. Standard curve for determining *Bd* viability
  - Figures S2, S3. Kaplan-Meier survivorship curves
  - Figures S4, S5. Correlations of mucosome function and skin peptide effectiveness against *Bd*
  - Figure S6. Growth of bacteria with skin peptides or *Bd* filtrate
- IV. Supplementary References

#### I. Protocol for determining *Bd* viability

##### *Plate preparation –*

Wash *Batrachochytrium dendrobatidis* (*Bd*) zoospores from agar plates (4-5 d old cultures) with 3 ml Tris-buffered saline (TBS, pH 7.4) per plate 15-20 min. Collect zoospores in tube and determine density by haemocytometer count using Lugol solution (Sigma) to kill and stain zoospores (90 µl Lugol solution, 10 µl zoospores). Dilute to 10<sup>6</sup> zoospores ml<sup>-1</sup>. Add 50 µl zoospores to each well of 96-well flat-bottom plate, except for negative control wells. For negative control wells, heat-kill zoospores at 60°C for 10 min or flash freeze in liquid nitrogen. We suggest replicates of 4 wells per sample and 8 wells per control or standard. A standard curve can be generated by adding various proportions of live:dead zoospores (Supplementary Fig. S1). Cover plates to minimize evaporation. Sterile conditions are not necessary.

##### *Wash preparation –*

Weigh amphibians, calculate surface area according to Spight (1968; salamanders) or McClanahan & Baldwin (1969; frogs).

To convert frog mass to surface area: surface area in cm<sup>2</sup> = 9.9\*(mass in g)<sup>(0.56)</sup>

To convert salamander mass to surface area: surface area in cm<sup>2</sup> = 8.42\*(mass in g)<sup>(0.694)</sup>

Divide surface area by 4 to determine quantity of water to add to the amphibian for the wash (0.25 ml per 1 cm<sup>2</sup> surface area). Rinse amphibian for 1 hr. Remove amphibian, place wash solution on ice. Add 50 µl wash solution per well in 96-well plate (4 wells per amphibian wash sample).

Alternatively, a syringe filter can be used to filter skin wash or water from the amphibian habitat to remove live bacterial cells. The filtrate can then be tested as above, or in a standard fungal growth assays (Rollins-Smith et al., 2002).

#### *Stain preparation-*

Use the LIVE/DEAD Sperm viability kit (Molecular Probes, L-7011). Dilute stock SYBR 14 dye (1mM SYBR 14 in DMSO) 1:100 in 1X TBS.

1 plate = 96 wells x 6 µl = 576 µl diluted SYBR 14 needed.

580/100 = 5.8 µl stock + 574.2 µl TBS

Use Propidium iodide undiluted.

#### *Assay –*

Add 50 µl water to control wells and standard wells. Add 50 µl wash solution to sample wells. You should have 100 µl total volume in all wells. Incubate 1 hr. Add 6 µl diluted SYBR 14 per well. Cover from light and incubate 10 min. Add 4 µl undiluted Propidium iodide, cover, and incubate 10 min.

Read plates according to kit instructions. For green fluorescence (SYBR 14) this is approximately (excitation-emission) 485-528 nm, and for red fluorescence (Propidium iodide) this is 530-645 nm. Calculate proportion of green:red fluorescence. Produce a curve based on the standards, fit a line and use the equation to calculate proportion living zoospores from your proportion fluorescence sample values.

This assay was first adapted for detecting *Bd* viability by Stockwell et al. (2010). Care should be taken when interpreting results of *Bd* viability assays using this method after inducing secretions of large quantities of skin peptides as these concentrations interfere with fluorescence measurements. *Bd* growth assays (see main text) may be a better method to test the effects of induced or concentrated peptides on *Bd*.

An alternative and inexpensive method is to examine *Bd* zoospore viability with a compound microscope after staining with trypan blue dye according to McMahon and Rohr (2014).

## II. Supplementary Tables

**Table S1.** Accession numbers for partial 16S rRNA gene sequences in the European Nucleotide Archive (<http://www.ebi.ac.uk/ena/data/view/HE802986-HE802992>). All sequences are unique at 99% similarity as determined by the UCLUST algorithm in QIIME (Caporaso *et al.*, 2010).

| Accession number | OTU (97% similarity) | Organism                           | Isolate name | Isolation source                        |
|------------------|----------------------|------------------------------------|--------------|-----------------------------------------|
| HE802986         | 1                    | <i>Serratia plymuthica</i>         | 5/27b2       | eggs of <i>Alytes obstetricans</i>      |
| HE802987         | 1                    | <i>Serratia plymuthica</i>         | 5/28a3       | eggs of <i>Alytes obstetricans</i>      |
| HE802988         | 2                    | <i>Flavobacterium johnsoniae</i>   | 81c12        | adult female <i>Alytes obstetricans</i> |
| HE802989         | 3                    | <i>Flavobacterium johnsoniae</i>   | 81a1         | adult female <i>Alytes obstetricans</i> |
| HG313637         | 3                    | <i>Flavobacterium johnsoniae</i>   | 70d1         | adult male <i>Alytes obstetricans</i>   |
| HE802990         | 4                    | <i>Pseudomonas filiscindens</i>    | 73c1         | adult male <i>Alytes obstetricans</i>   |
| HE802992         | 4                    | <i>Pseudomonas plecoglossicida</i> | 76c1         | adult male <i>Alytes obstetricans</i>   |
| HE802991         | 5                    | <i>Pseudomonas migulae</i>         | 73b1         | adult male <i>Alytes obstetricans</i>   |
| HG313686         | 6                    | <i>Pseudomonas fluorescens</i>     | 76.5c        | eggs of <i>Alytes obstetricans</i>      |
| HG752431         | 6                    | <i>Pseudomonas sp.</i>             | 71a2         | adult <i>Alytes obstetricans</i>        |
| HG313693         | 7                    | <i>Janthinobacterium lividum</i>   | 77.5b1       | eggs of <i>Alytes obstetricans</i>      |

**Table S2.** Environmental context experiments including bacterial isolates grown under various competitive and temperature conditions. Filtered metabolites washed from experimental R2A with 1% tryptone agar plates were added to *Batrachochytrium dendrobatidis* (*Bd*; Swiss isolate TG 729) zoospores in 96-well plates. *Bd* was monitored for growth and significant growth inhibition or enhancement is reported as well as non-significant changes (ns, Independent t-test,  $P > 0.05$ ).

| Experiment | Treatment                                      | <i>Bd</i> | Temperature (°C) | Metabolite effect on <i>Bd</i> |
|------------|------------------------------------------------|-----------|------------------|--------------------------------|
| 1          | Control                                        |           | 18               | enhancing                      |
| 2          | Control                                        |           | 18               | enhancing                      |
| 3          | Control                                        | +         | 18               | ns                             |
| 4          | Control                                        | +         | 18               | enhancing                      |
| 5          | <i>Serratia plymuthica</i> isolate 27          |           | 18               | inhibitory                     |
| 6          | <i>Serratia plymuthica</i> isolate 27          |           | 18               | inhibitory                     |
| 7          | <i>Serratia plymuthica</i> isolate 28          |           | 18               | inhibitory                     |
| 8          | <i>Serratia plymuthica</i> isolate 28          |           | 18               | inhibitory                     |
| 9          | <i>Serratia plymuthica</i> isolate 27          |           | 25               | ns                             |
| 10         | <i>Serratia plymuthica</i> isolate 27          |           | 25               | inhibitory                     |
| 11         | <i>Serratia plymuthica</i> isolate 28          |           | 25               | enhancing                      |
| 12         | <i>Serratia plymuthica</i> isolate 28          |           | 25               | enhancing                      |
| 13         | <i>Serratia plymuthica</i> isolate 27          | +         | 18               | ns                             |
| 14         | <i>Serratia plymuthica</i> isolate 27          | +         | 18               | inhibitory                     |
| 15         | <i>Serratia plymuthica</i> isolate 28          | +         | 18               | ns                             |
| 16         | <i>Serratia plymuthica</i> isolate 28          | +         | 18               | ns                             |
| 17         | <i>Flavobacterium johnsoniae</i> 81c12         |           | 18               | inhibitory                     |
| 18         | <i>Flavobacterium johnsoniae</i> 81c12         |           | 18               | inhibitory                     |
| 21         | <i>Flavobacterium johnsoniae</i> 81a1          |           | 18               | ns                             |
| 22         | <i>Flavobacterium johnsoniae</i> 81a1          |           | 18               | ns                             |
| 23         | <i>Flavobacterium johnsoniae</i> both isolates |           | 18               | inhibitory                     |
| 24         | <i>Flavobacterium johnsoniae</i> both isolates |           | 18               | inhibitory                     |
| 25         | <i>Flavobacterium johnsoniae</i> both isolates | +         | 18               | ns                             |
| 26         | <i>Flavobacterium johnsoniae</i> both isolates | +         | 18               | ns                             |
| 27         | <i>Pseudomonas filiscindens</i> 73c1           |           | 18               | ns                             |
| 28         | <i>Pseudomonas filiscindens</i> 73c1           |           | 18               | inhibitory                     |
| 29         | <i>Pseudomonas migulae</i> 73b1                |           | 18               | inhibitory                     |
| 30         | <i>Pseudomonas migulae</i> 73b1                |           | 18               | inhibitory                     |
| 31         | <i>Pseudomonas plecoglossicida</i> 76c1        |           | 18               | inhibitory                     |
| 32         | <i>Pseudomonas plecoglossicida</i> 76c1        |           | 18               | ns                             |
| 33         | <i>Pseudomonas</i> all three isolates          |           | 18               | ns                             |
| 34         | <i>Pseudomonas</i> all three isolates          |           | 18               | inhibitory                     |
| 35         | <i>Pseudomonas</i> all three isolates          | +         | 18               | inhibitory                     |
| 36         | <i>Pseudomonas</i> all three isolates          | +         | 18               | inhibitory                     |
| 37         | <i>Pseudomonas fluorescens</i> 76.5c           |           | 18               | ns                             |
| 38         | <i>Pseudomonas fluorescens</i> 76.5c           |           | 18               | ns                             |
| 39         | <i>Pseudomonas fluorescens</i> 76.5c           |           | 18               | inhibitory                     |

### III. Supplementary Figures

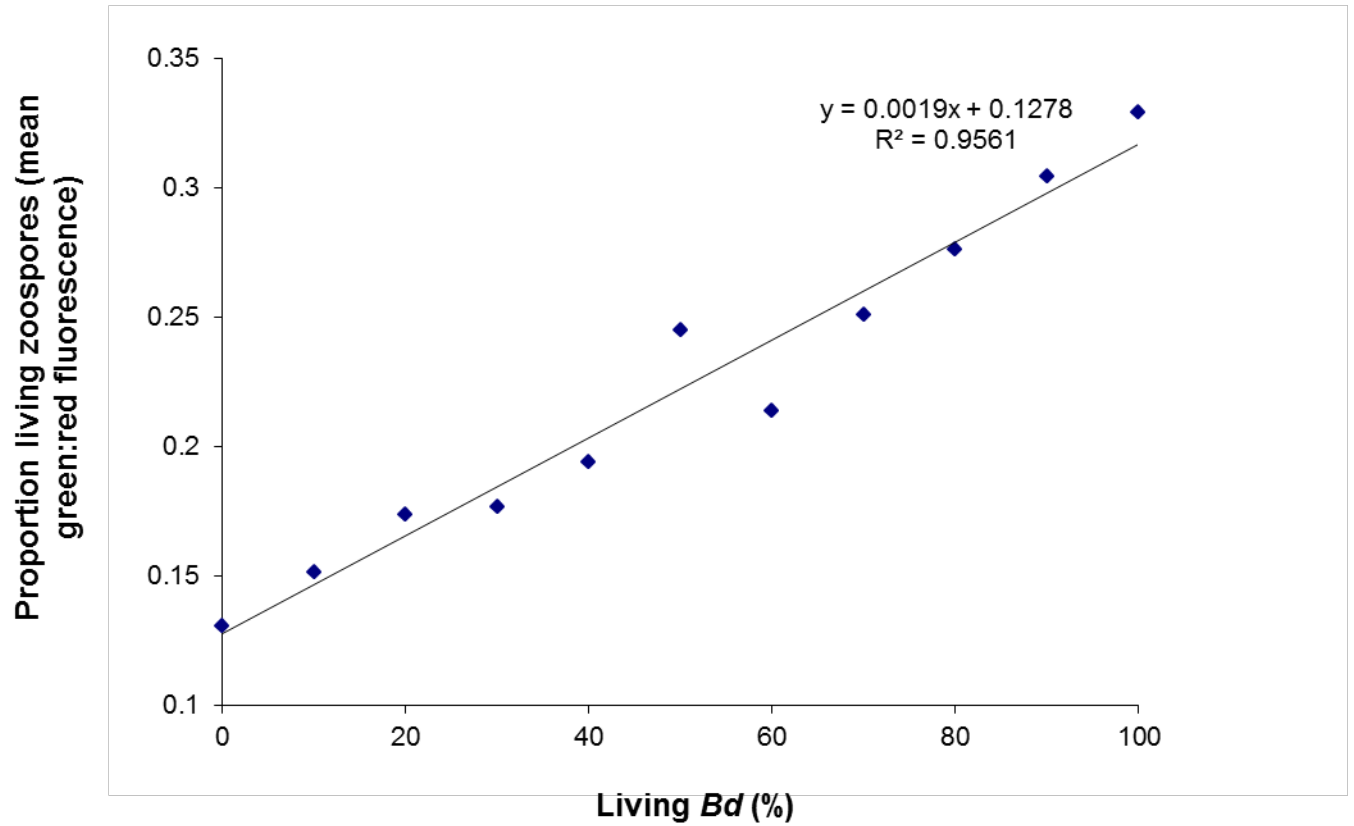

**Figure S1. Standard curve showing ratio of fluorescence at various concentrations of living zoospores produced by combining live zoospores and heat-killed zoospores in Tris-buffered saline.**

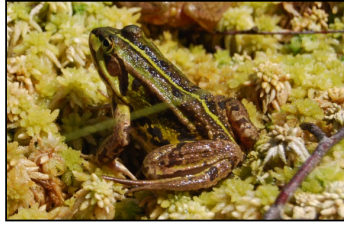

*Pelophylax esculentus*

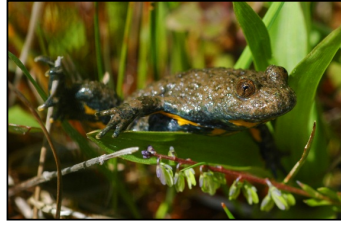

*Bombina variegata*

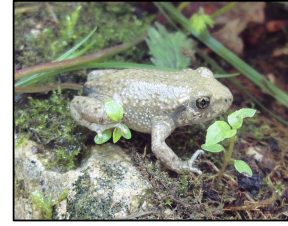

*Alytes obstetricans*

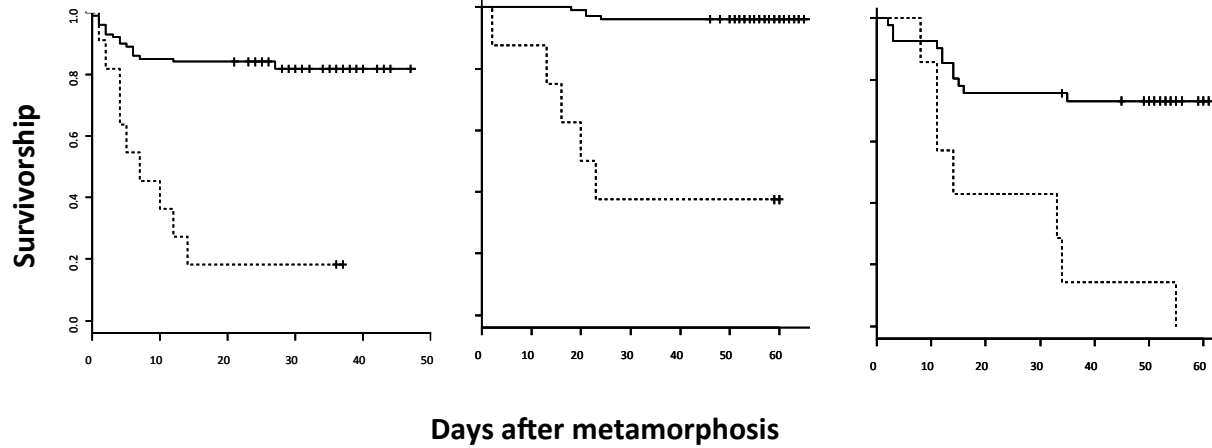

**Figure S2. Kaplan-Meier survivorship curves for uninfected (solid lines) and infected (dashed lines) tadpoles upon metamorphosis.** Small vertical lines indicate individuals that survived until removal from the experiment. Inoculation dose was not found to influence infection or survival outcomes (Baumgartner, 2009), thus dose treatments were combined for analysis.

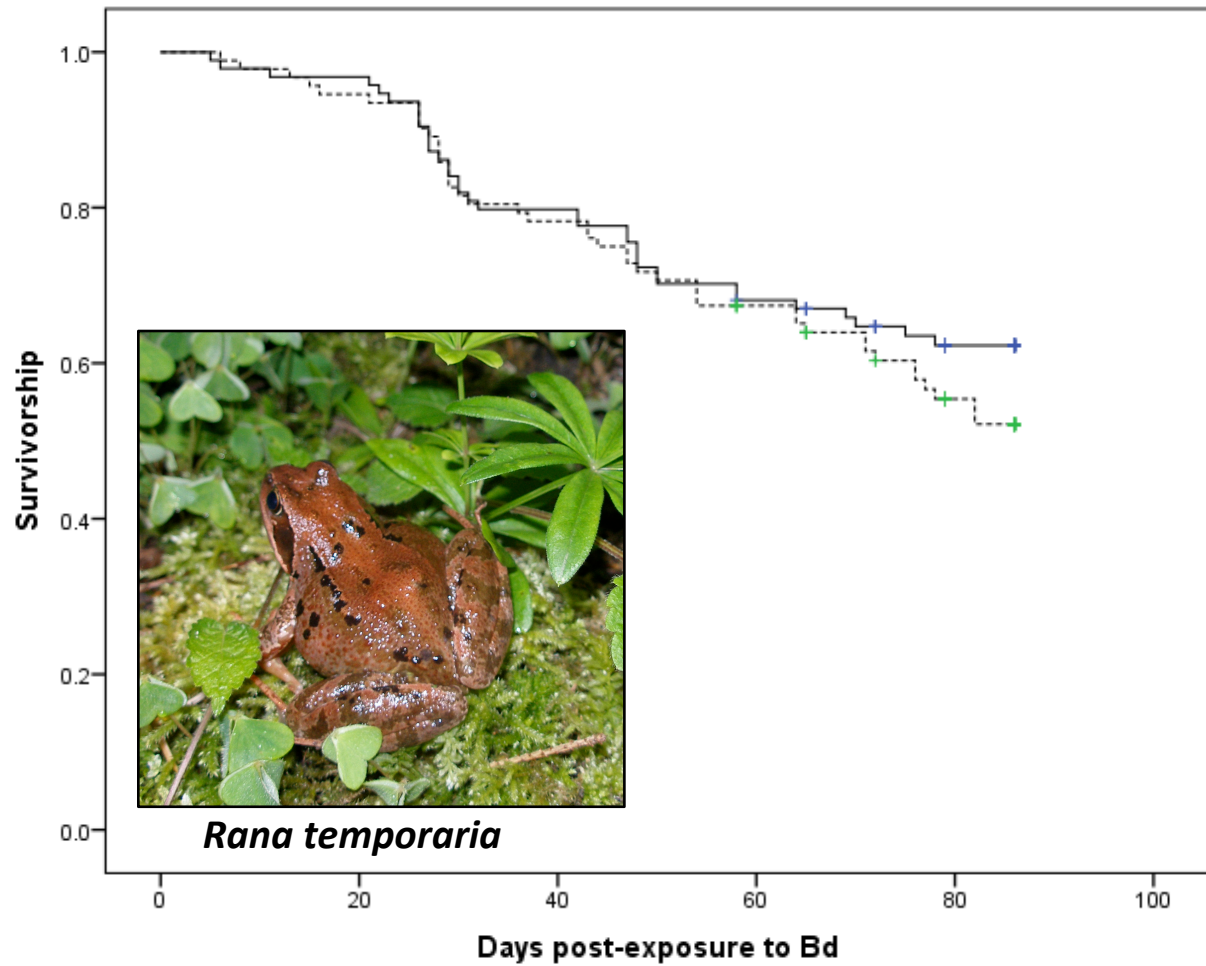

**Figure S3. Kaplan-Meier survivorship curves for control (solid lines) and exposed (dashed lines) *Rana temporaria* exposed to *Bd* at metamorphosis.** Small vertical lines indicate individuals that survived until removal from the experiment. Additional experimental details are found in Küpfer (2010).

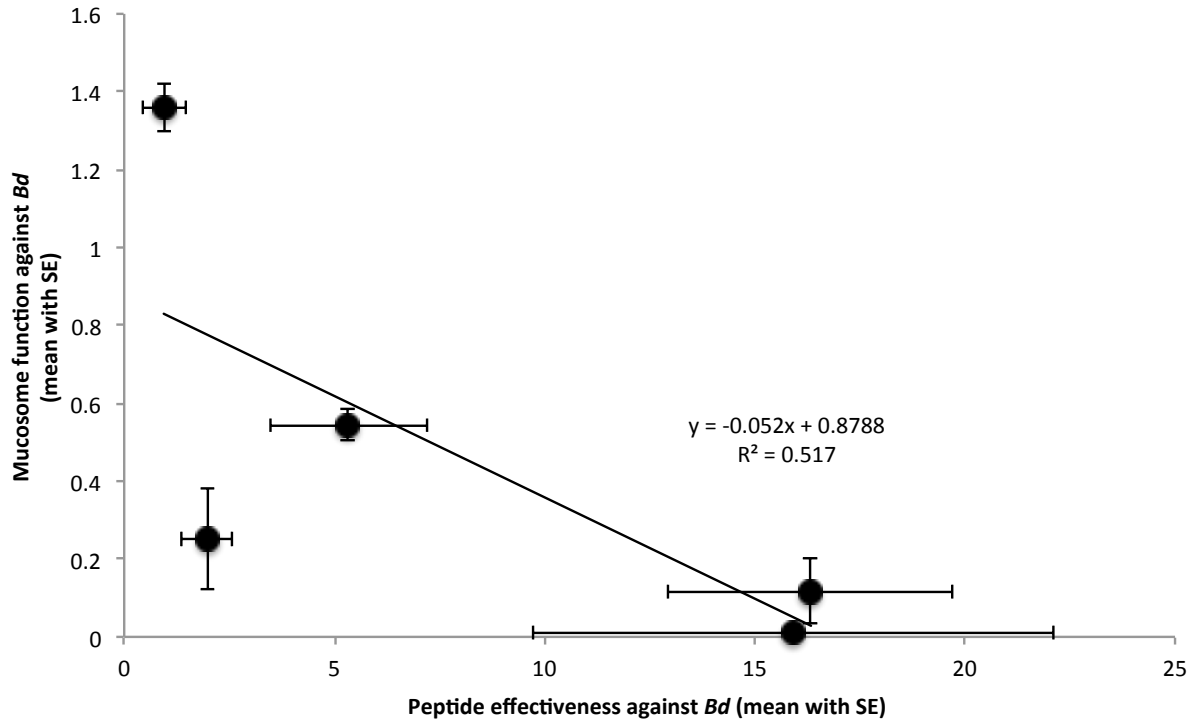

**Figure S4. Correlation of skin peptide effectiveness against *Bd* and viability of *Bd* after exposure to amphibian mucus (mucosome function) including adults of five amphibian species from Switzerland indicating that skin peptides explain some of the variation in mucosome function.**



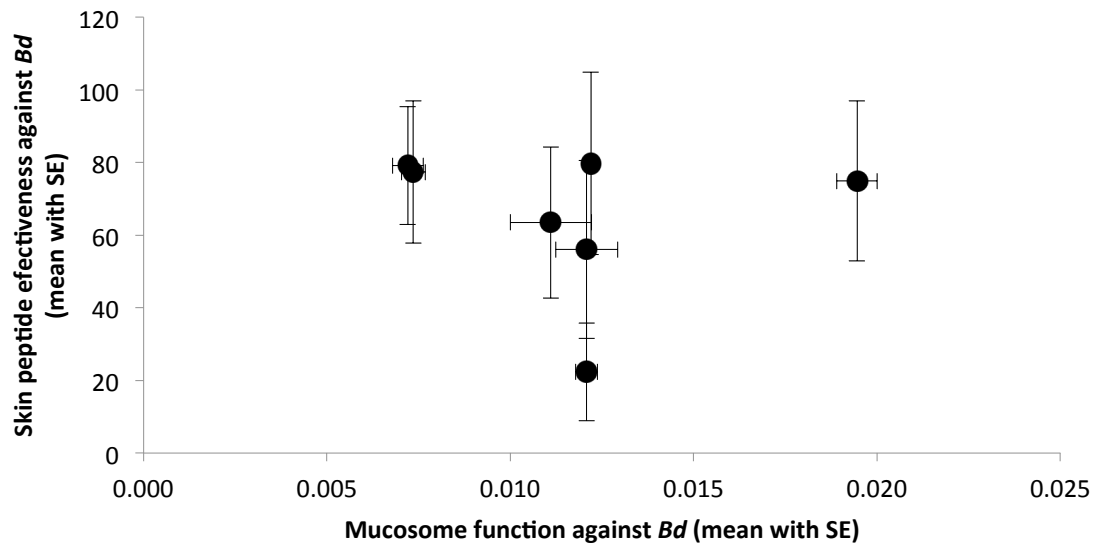

**Figure S5. Correlation of skin peptide effectiveness against *Bd* and viability of *Bd* after exposure to amphibian mucus (mucosome function) including *Alytes obstetricans* from seven experimental treatments.** Skin peptide effectiveness did not differ significantly among treatments and the far right outlier indicates frogs exposed to *Bd* with suppressed mucosome function. When the *Bd*-exposed frogs are excluded, *Bd* viability after mucosome exposure shows a negative correlation with skin peptide effectiveness.

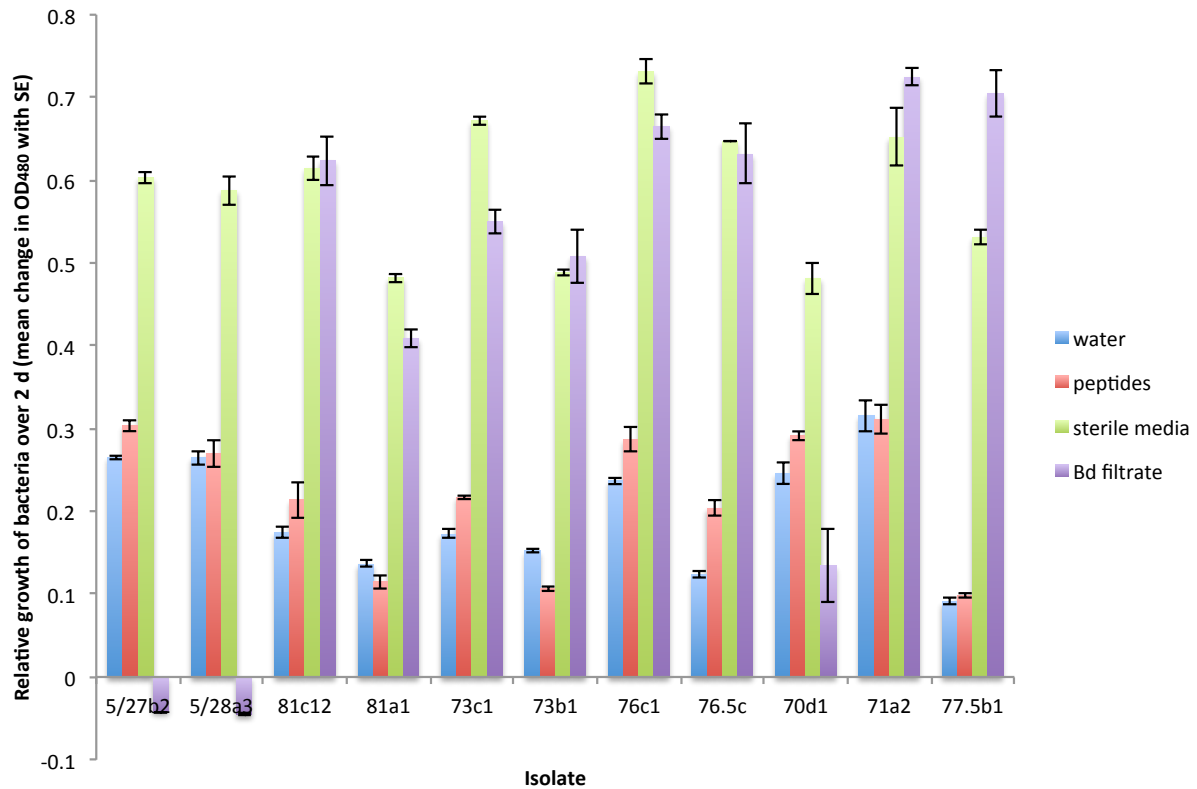

**Figure S6. Growth of bacteria over 2 d measured by change in optical density at 480nm (OD<sub>480</sub>).** Water is the control for peptides, and sterile media (0.5% tryptone) is the control for *Bd* filtrate from GPL type isolate JEL197. Skin peptides from *A. obstetricans* (100 µg/ml) significantly inhibited growth of *Pseudomonas migulae* (73b1) and significantly enhanced growth of *P. filiscindens* (73c1), *Flavobacterium johnsoniae* (70d1), and *Janthinobacterium lividum* (76.5c; t-test, Bonferroni corrected P's < 0.05). Filtrate from two-week old cultures of *Bd* significantly inhibited the growth of *Serratia plymuthica* (5/27b2, 5/28a3), *F. johnsoniae* (81a1, 70d1), *P. filiscindens* (73c1), while significantly enhancing the growth of *J. lividum* (77.5b1).

#### IV. Supplementary References

Baumgartner S (2009) Experimental infection of three native European amphibian larvae by the pathogen *Batrachochytrium dendrobatidis*. Master's thesis, University of Zurich.

Caporaso JG, Kuczynski J, Stombaugh J, Bittinger K, Bushman FD, et al. (2010) QIIME allows analysis of high-throughput community sequencing data. *Nat Meth* 7: 335-336.

Daum JM, Davis LR, Bigler L, Woodhams DC (2012) Hybrid advantage in skin peptide immune defenses of water frogs (*Pelophylax esculentus*) at risk from emerging pathogens. *Infect Genet Evol* 12: 1854-1864.

Küpfer E (2011) Anthropogenic stress reduces fitness and antimicrobial immune defence in common frogs (*Rana temporaria*). Master's thesis, University of Zurich.

McClanahan LJ, Baldwin R (1969) Rate of water uptake through the integument of the desert toad, *Bufo punctatus*. *Comp Biochem Physiol* 28: 381-389.

McMahon TA, Rohr JR (2014). Trypan blue dye is an effective and inexpensive way to determine the viability of *Batrachochytrium dendrobatidis* zoospores. *Ecohealth* DOI: 10.1007/s10393-014-0908-0.

Rollins-Smith LA, Doersam JK, Longcore JE, Taylor SK, Shamblin JC, et al. (2002) Antimicrobial peptide defenses against pathogens associated with global amphibian declines. *Dev Comp Immunol* 26: 63-72.

Spight TM (1968) The water economy of salamanders: evaporative water loss. *Chicago J* 41: 195-203.

Stockwell MP, Clulow J, Mahony MJ (2010). Efficacy of SYBR 14/propidium iodide viability stain for the amphibian chytrid fungus *Batrachochytrium dendrobatidis*. *Dis Aquat Org* 88: 177-181.
